# Supplementary material for: Changes in the expression of genes encoding type IV pili-associated proteins are seen when Clostridium perfringens is grown in liquid or on surfaces
Source: PubMed Central journal article supplement (PMC6958937; doi:10.1186/s12864-020-6453-z), 2020-01-14
Supplement: 12864_2020_6453_MOESM1_ESM.pdf [file 12864_2020_6453_MOESM1_ESM.pdf]

## Supplemental Material

**Table S1** Strains and plasmids used in this study.

| Strain or plasmid (parent)     | Relevant genotype                                                                                                           | Selection/Resistance | Source         |
|--------------------------------|-----------------------------------------------------------------------------------------------------------------------------|----------------------|----------------|
| <i>Escherichia coli</i>        |                                                                                                                             |                      |                |
| DH10B                          | F <sup>-</sup> <i>mcrAΔ mrr-hsdRMS mcrBC φ80dlacZΔM15 lacX74 deoR recA1 araD139Δ ara, leu7697 galU galKΔrpsL endA1 nupG</i> | None                 | Gibco/BRL      |
| <i>Clostridium perfringens</i> |                                                                                                                             |                      |                |
| HN13                           | Wild type; <i>galKT</i> -                                                                                                   | None                 | (1)            |
| AH2                            | Mutant in <i>bglR</i> ; <i>uidA</i> fusion parent strain                                                                    | Erm                  | (2)            |
| AH7                            | $\Delta pilA1$ , from HN13                                                                                                  | None                 | This study     |
| AH8                            | $\Delta pilA2$ , from HN13                                                                                                  | None                 | This study     |
| AH9                            | $\Delta pilA3$ , from HN13                                                                                                  | None                 | This study     |
| AH10                           | $\Delta pilA4$ , from HN13                                                                                                  | None                 | This study     |
| SRM4                           | <i>pilA1</i> operon promoter fused to <i>uidA</i> in HN13                                                                   | Erm Cm               | This study     |
| SRM9                           | <i>pilA2</i> operon promoter fused to <i>uidA</i> in HN13                                                                   | Erm Cm               | This study     |
| SRM10                          | <i>pilA3</i> operon promoter fused to <i>uidA</i> in HN13                                                                   | Erm Cm               | This study     |
| SRM5                           | <i>pilB1</i> operon promoter fused to <i>uidA</i> in HN13                                                                   | Erm Cm               | This study     |
| SRM6                           | <i>pilD</i> operon promoter fused to <i>uidA</i> in HN13                                                                    | Erm Cm               | This study     |
| SRM7                           | <i>pilM</i> operon promoter fused to <i>uidA</i> in HN13                                                                    | Erm Cm               | This study     |
| SRM8                           | <i>pilT</i> operon promoter fused to <i>uidA</i> in HN13                                                                    | Erm Cm               | This study     |
| <i>Plasmids</i>                |                                                                                                                             |                      |                |
| pSRM18                         | <i>cpe1788</i> in pKRAH1                                                                                                    | Cm                   | This study     |
| pSRM8                          | <i>pilA1::uidA</i> in pJV50                                                                                                 | Cm                   | This study     |
| pSRM22                         | <i>pilA2::uidA</i> in pJV50                                                                                                 | Cm                   | This study     |
| pSRM23                         | <i>pilA3::uidA</i> in pJV50                                                                                                 | Cm                   | This study     |
| pSRM10                         | <i>pilB1::uidA</i> in pJV50                                                                                                 | Cm                   | This study     |
| pSRM12                         | <i>pilD::uidA</i> in pJV50                                                                                                  | Cm                   | This study     |
| pSRM14                         | <i>pilM::uidA</i> in pJV50                                                                                                  | Cm                   | This study     |
| pSRM16                         | <i>pilT::uidA</i> in pJV50                                                                                                  | Cm                   | This study     |
| pJV50                          | Suicide vector used for <i>uidA</i> fusion strains                                                                          | Cm                   | (3)            |
| pKRAH1                         | Lactose inducible expression vector                                                                                         | Cm                   | (2)            |
| pAH10                          | <i>pilA2</i> in pKRAH1                                                                                                      | Cm                   | Andrea Hartman |
| pKRAH1- <i>pilB2</i>           | <i>pilB2</i> in pKRAH1                                                                                                      | Cm                   | Andrea Hartman |
| pKRAH1- <i>pilC2</i>           | <i>pilC2</i> in pKRAH1                                                                                                      | Cm                   | Andrea Hartman |
| pKRAH1- <i>pilT</i>            | <i>pilT</i> in pKRAH1                                                                                                       | Cm                   | Andrea Hartman |
| pKRAH1- <i>cpe2277</i>         | <i>cpe2277</i> in pKRAH1                                                                                                    | Cm                   | Andrea Hartman |
| pSRM24                         | <i>lon</i> in pKRAH1                                                                                                        | Cm                   | This study     |
| pSRM35                         | Promoterless <i>sr79</i> in pKRAH1                                                                                          | Cm                   | This study     |
| pSM240                         | Vector for measuring promoter activity in <i>C. perfringens</i>                                                             | Cm                   | (2)            |
| pSM400                         | <i>pilA2</i> promoter region in pSM240                                                                                      | Cm                   | This study     |
| pSM401                         | <i>pilB2</i> promoter region in pSM240                                                                                      | Cm                   | This study     |
| pSM402                         | <i>pilD</i> promoter region in pSM240                                                                                       | Cm                   | This study     |

**Table S2** Primers used in this study.

| <b>Primer</b>                    | <b>Sequence (5' - 3')</b>                                    |
|----------------------------------|--------------------------------------------------------------|
| <i>pilA1::uidA</i>               |                                                              |
| OSRM24                           | gtaGTCGACTtattttgtagacaactgggaaaaactgtg (Sall site)          |
| OSRM25                           | cacgggtgggggttctacaggacgtaacatcagtaataacatttatggctctcc       |
| OSRM26                           | ggaggaccataaatgttattactgatgttacgtcctgtagaaacccaaccctg        |
| <i>pilA2::uidA</i>               |                                                              |
| OSRM50                           | cactagGTCGACTattagataaaaacagcagattttatgatgatgaac (Sall site) |
| OSRM51                           | ggaaaaccaatgaatacaatgttacgtcctgtag                           |
| OSRM52                           | ctacaggacgtaacattgtattcattggtttcc                            |
| <i>pilA3::uidA</i>               |                                                              |
| OSRM53                           | ggaGTCGACactggaaatccagattctacttacttattagtg (Sall site)       |
| OSRM54                           | ctacaggacgtaacataaattttcatttaacacc                           |
| OSRM55                           | ggtgattaaatgaaaaattatgttacgtcctgtag                          |
| <i>pilB1::uidA</i>               |                                                              |
| OSRM27                           | gatGTCGACggaagctatacttttagaaaagcaaatag (Sall site)           |
| OSRM28                           | cacgggtgggggttctacaggacgtaacataatattcatatatacaacctctc        |
| OSRM29                           | gaggaggtgatataatgaaatataatgttacgtcctgtacaacccaaccctg         |
| <i>pilD::uidA</i>                |                                                              |
| OSRM30                           | ggatagGTCGACcgctaaggcaaaagtagataacaaaattg (Sall site)        |
| OSRM31                           | cacgggtgggggttctacaggacgtaacattatagacacattgctcccaaatcatcc    |
| OSRM32                           | ggatgattgggaggcaatgtgtctataatgttacgtcctgtagaaacccaaccctg     |
| <i>pilM::uidA</i>                |                                                              |
| OSRM33                           | catcaGTCGACgctttggtgctgaaggtaagataataggagg (Sall site)       |
| OSRM34                           | cacgggtgggggttctacaggacgtaacattatgccaactttcctccttacc         |
| OSRM35                           | ggtaaaggagggaagtttggcaataatgttacgtcctgtagaaacccaaccctg       |
| <i>pilT::uidA</i>                |                                                              |
| OSRM36                           | caaGTCGACgggaatcagacttgcaacatatgcagc (Sall site)             |
| OSRM37                           | cacgggtgggggttctacaggacgtaacataxtttgcataaatctcctctaac        |
| OSRM38                           | gttaggaggagatttatgcaaagtatgttacgtcctgtagaaacccaaccctg        |
| All <i>uidA</i> fusion C-termini |                                                              |
| OSRM39                           | gttCTGCAGgattcattgtttgcctccc (PstI site)                     |
| <i>pilA2</i> qRT-PCR             |                                                              |
| OSRM62                           | tcaaatgctaagacgacgttacag                                     |
| OSRM63                           | tctactgcaaacaccaccatcaa                                      |
| <i>pilB2</i> qRT-PCR             |                                                              |
| OSRM78                           | tgtgcgtccgtatatactgt                                         |
| OSRM79                           | gctttgttaattcttccgctgc                                       |
| <i>pilC2</i> qRT-PCR             |                                                              |
| OSRM76                           | tgaaaaagagaxaagataagaggaaaga                                 |
| OSRM77                           | gcaataatagctaccactccaagaact                                  |
| <i>pilT</i> qRT-PCR              |                                                              |
| OSRM64                           | gaatgagaacgatggacatggaa                                      |
| OSRM65                           | gcacaattcattgctgttctt                                        |
| <i>cpe2277</i> qRT-PCR           |                                                              |
| OSRM68                           | tctgtaggaagtggagtgagtt                                       |
| OSRM69                           | tcttacattgggtaaatctcaaac                                     |
| <i>lon</i> qRT-PCR               |                                                              |
| OSRM70                           | ggtagttggtcaagagagagctgtta                                   |
| OSRM71                           | caaccctggaggtccataa                                          |
| pSRM35                           |                                                              |

|                                            |                                                                       |
|--------------------------------------------|-----------------------------------------------------------------------|
| OSRM108                                    | GTCGACgaaaagtttatgaaaacaggttatttagaaattaattg (Sali site)              |
| OSRM95                                     | gctaaaacaacagtttaattctattaatgtGGATCCccc (BamHI site)                  |
| <i>ΔpilA1</i>                              |                                                                       |
| OAH129 (5' primer for upstream fragment)   | gtcgacgtgatgcaggttaggatttgatgc                                        |
| OAH130 (3' primer for upstream fragment)   | gtatatttatactatagacaccgtaacttttcttctgct ttcagtaataacatttatggctctcc    |
| OAH131(5' primer for downstream fragment)  | ggaggaccataaatgttattactgaaagcaggaagaaaag ttacgggtctatagtataaataatcccc |
| OAH132 (3' primer for downstream fragment) | ggatccgctaatactgctattattccaccaataataaatg                              |
| <i>ΔpilA2</i>                              |                                                                       |
| OAH133 (5' primer for upstream fragment)   | gtcgaccaaacttacttagcatgattgatg c                                      |
| OAH134(3' primer for upstream fragment)    | gattatttctttagtagtactgatgcgtttgttttt tgtattcattgggtttcc               |
| OAH135 (5' primer for downstream fragment) | ggaaaaccaatgaatacaaaaaaacaacgcacagtaa ctaatgaagaaataatc               |
| OAH136 (3' primer for downstream fragment) | ggatcccaccagatttttagttttataagtattaac                                  |
| <i>ΔpilA3</i>                              |                                                                       |
| OAH137(5' primer for upstream fragment)    | gtcgacaaaagatttagcaatggatcaagtttag                                    |
| OAH169 (3' primer for upstream fragment)   | cacctccaacctcttttttttttttctatttttca ttaatcaccatctttctc                |
| OAH170 (5' primer for downstream fragment) | gagaagatgggtgattaatgaaaaatagaataaaaaataaaagatgggttggaggtg             |
| OAH140 (3' primer for downstream fragment) | ggatccggcaaatggtaacatcgaatctaaatg                                     |
| <i>ΔpilA4</i>                              | gagaagatgggtgattaatgaaaaatagaataaaaaat aaaagatgggttggaggtg            |
| OAH141(5' primer for upstream fragment)    | gtcgacactgtaaaagataagaaatacaagaatccc                                  |
| OAH142 (3' primer for upstream fragment)   | cctcataaatcacttaacattaattttccatagcctctt ttactatacatatttcatgcctcaaagg  |
| OAH143 (5' primer for downstream fragment) | cctttgaggcatgaaatagtatagtaaaaggcatat ggaaaattaatgtaagtatttatgagg      |
| OAH144 (3' primer for downstream fragment) | ggatccataacaataaatcctttcttctgatttttaacc                               |
| <i>ΔsigV</i>                               |                                                                       |
| OSRM84 (5' primer for upstream fragment)   | gggtcgcaccagaagaggtgctaaagc                                           |
| OSRM85 (3' primer for upstream fragment)   | gctaggaggggaaagatgaaaaaactatgggctatttaaatgaataaaaaagacttag            |
| OSRM86 (5' primer for downstream fragment) | ctaagcttttttattcatttaaatagccatagtttttccatcttccccctctagc               |
| OSRM87 (3' primer for downstream fragment) | ccgtaaaacttacttttagcttctgcagcatagggatcctgc                            |
| <i>ΔCPE0560</i>                            |                                                                       |
| OSRM88 (5' primer for upstream fragment)   | 5' ggcGTCGACatagttaaagatgagcaggtatgctcttgaag 3' (Sali site)           |
| OSRM89 (3' primer for upstream fragment)   | 5' ggaggctatttaaatgaataaaaaagacggaaataaattagaataaacaaggttat 3'        |
| OSRM90 (5' primer for                      | 5' ataacctgtttattctaaattatttccgtctttttttattcatttaaatagccctcc 3'       |

|                                            |                                                                |
|--------------------------------------------|----------------------------------------------------------------|
| downstream fragment)                       |                                                                |
| OSRM91 (3' primer for downstream fragment) | 5' ctcGGATCCgtagcacagtgagtaactgcagctacg 3' (BamHI site)        |
| pKRAH-pilC2                                |                                                                |
| OAH117                                     | 5'-CTGCAGtaattaggtgaaagaaaaggagaggaattatggc-3'                 |
| OAH118                                     | 5'-GTCGACttaatgatgatgatgatgacctatactgttatacattttaaacataggtg-3' |
| <i>pilA2</i> promoter                      |                                                                |
| OSM354                                     | 5'-cagcaGTCGACtatgatgatgaactagaaagagaaatac -3'                 |
| OSM355                                     | 5'-ccCTGCAGttttttgtttttgtattcattggttttcc -3'                   |
| <i>pilB2</i> promoter                      |                                                                |
| OSM356                                     | 5'- gGTCGACatatagcctttggaccagctatagg-3'                        |
| OSM357                                     | 5'-cCTGCAGcaattagtatactcctaaacgcttttc -3'                      |
| <i>pilD</i> promoter                       |                                                                |
| OSM358                                     | 5'-gGTCGACtataaaataataataaaactattttactacatgcc -3'              |
| OSM359                                     | 5'-ccCTGCAGaaaaaataattagacacattgcctcccaaadc -3'                |

**Table S3** Sample coverage.

| Sample  | Total Reads | Mapped Reads | Percentage of Mapped Reads |
|---------|-------------|--------------|----------------------------|
| BHILI1  | 18,534,996  | 16,302,909   | 88%                        |
| BHILI3  | 23,566,774  | 21,879,774   | 93%                        |
| BHIPL1  | 22,280,318  | 18,994,017   | 85%                        |
| BHIPL2  | 20,387,754  | 18,145,757   | 89%                        |
| PGYLI1  | 22,390,086  | 18,006,491   | 80%                        |
| PGYLI2  | 20,745,536  | 18,771,451   | 90%                        |
| PGYPL1  | 23,451,252  | 17,847,747   | 76%                        |
| PGYPL2  | 20,099,696  | 18,178,362   | 90%                        |
| FABGLI1 | 19,798,656  | 17,448,863   | 88%                        |
| FABGLI2 | 23,316,700  | 21,358,386   | 92%                        |
| FABGPL1 | 24,439,042  | 20,171,471   | 83%                        |
| FABGPL2 | 21,927,608  | 20,383,062   | 93%                        |

LI, liquid; PL, plate

**Table S4** Numbers of genes with differential expression in various media in crosswise comparisons.

|        | BHI | PGY | FABG | FABG/PGY | PGY/BHI | FABG/BHI | BHI/FABG | PGY/FABG | BHI/PGY | Total |
|--------|-----|-----|------|----------|---------|----------|----------|----------|---------|-------|
| Plates | 469 | 926 | 429  | 257      | 965     | 990      | 327      | 432      | 158     | 4953  |
| Liquid | 902 | 90  | 521  | 861      | 145     | 609      | 250      | 56       | 537     | 3971  |

Each comparison is based on two-fold or greater average transcripts per million (TPM) in each growth medium (BHI, PGY, or FABG) in either liquid-grown cells or plated cultures. For single comparisons, TPM was averaged for each gene for two samples, and differential expression was found by comparing plate and liquid values for each gene. For dual comparisons, the plate and liquid averages for every gene in the various media were compared.

## References used in Supplemental Material

1. Nariya H, Miyata S, Suzuki M, Tamai E, Okabe A. Development and application of a method for counterselectable in-frame deletion in *Clostridium perfringens*. *Applied and environmental microbiology*. 2011;77(4):1375-82.
2. Hartman AH, Liu H, Melville SB. Construction and characterization of a lactose-inducible promoter system for controlled gene expression in *Clostridium perfringens*. *Applied and environmental microbiology*. 2011;77(2):471-8.
3. Therit B, Cheung JK, Rood JI, Melville SB. NanR, a Transcriptional Regulator That Binds to the Promoters of Genes Involved in Sialic Acid Metabolism in the Anaerobic Pathogen *Clostridium perfringens*. *PloS one*. 2015;10(7):e0133217.
